# Supplementary material for: Multicomponent synthesis of styryl linked benzo[h]pyrazolo[3,4-b]quinoline-5,6(10H)-diones by liquid assisted grinding
Source: Royal Society of Chemistry journal article supplement (doi:10.1039/d1nj00770j), 2021-01-01
Supplement: d1nj00770j1.pdf [file d1nj00770j1.pdf]

Supporting Information

---

**Multicomponent synthesis of styryl linked  
benzo[*h*]pyrazolo[3,4-*b*]quinoline-5,6(10*H*)-diones  
by liquid assisted grinding**

**Rahul Yadav and Tasneem Parvin\***

*<sup>a</sup>Department of Chemistry, National Institute of Technology Patna, Ashok Rajpath, Patna-800 005*

|                                                                            |                |
|----------------------------------------------------------------------------|----------------|
| <b>Title Page.....</b>                                                     | <b>S1</b>      |
| <b><sup>1</sup>H and <sup>13</sup>C NMR spectra of compound 4a-4o.....</b> | <b>S2-S9</b>   |
| <b>Single Crystal XRD data of 4d and 4f.....</b>                           | <b>S10-S13</b> |

# Supporting Information

## <sup>1</sup>H NMR Spectra of Compound 4a

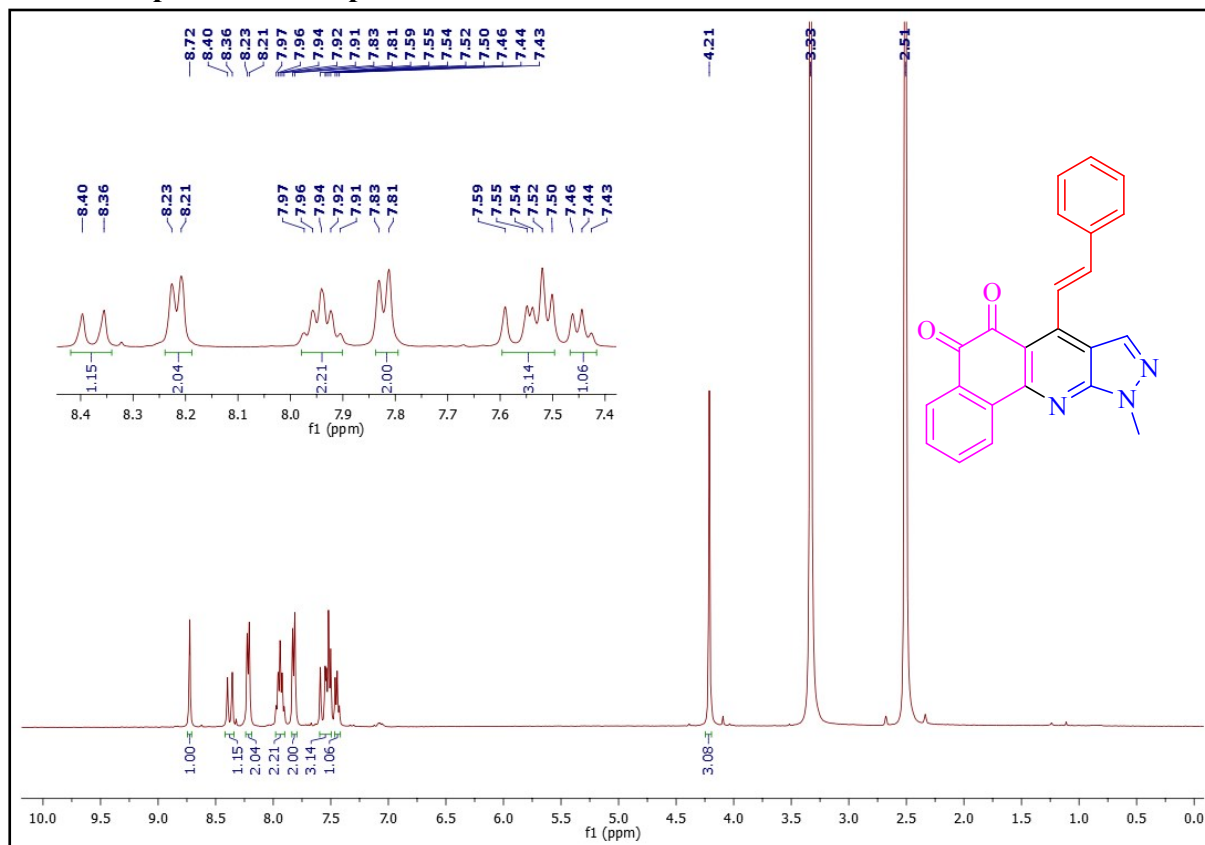

## <sup>1</sup>H NMR Spectra of Compound 4b

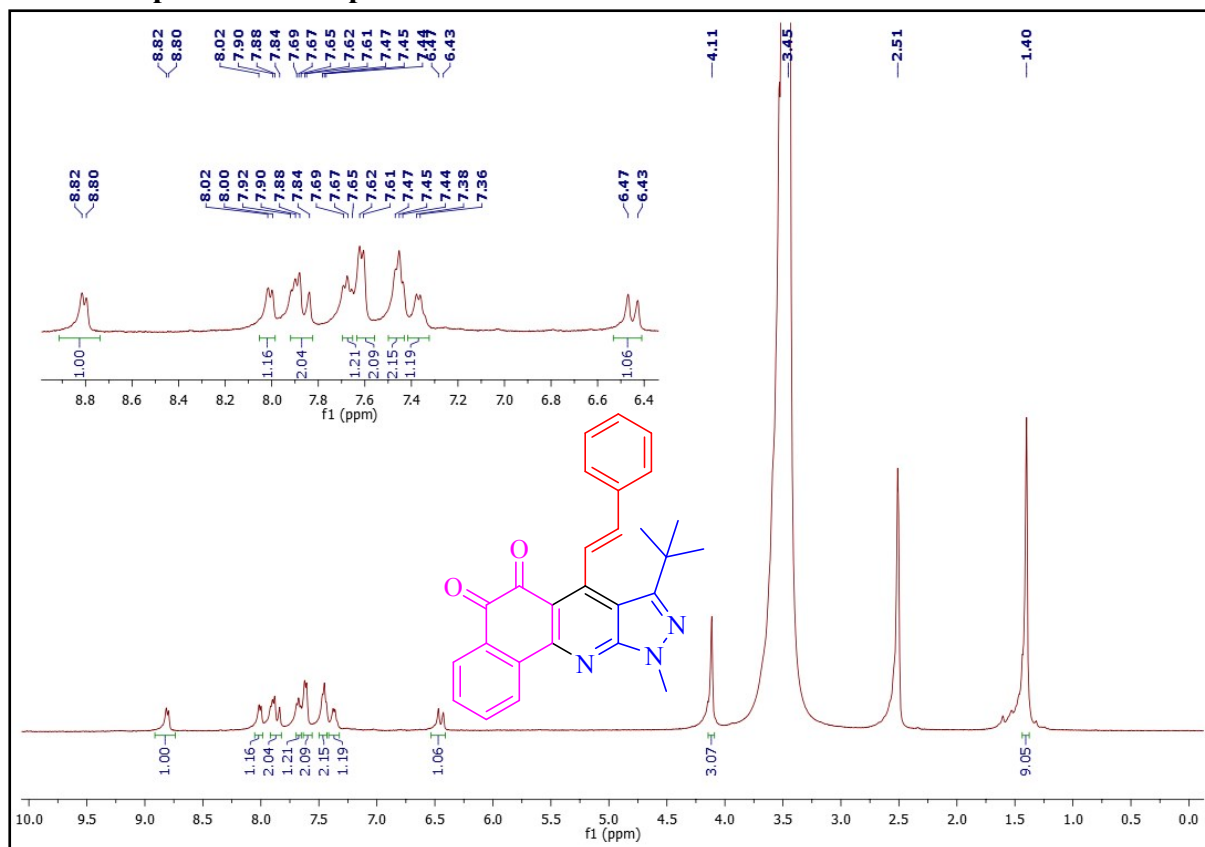

# Supporting Information

## <sup>1</sup>H NMR Spectra of Compound 4c

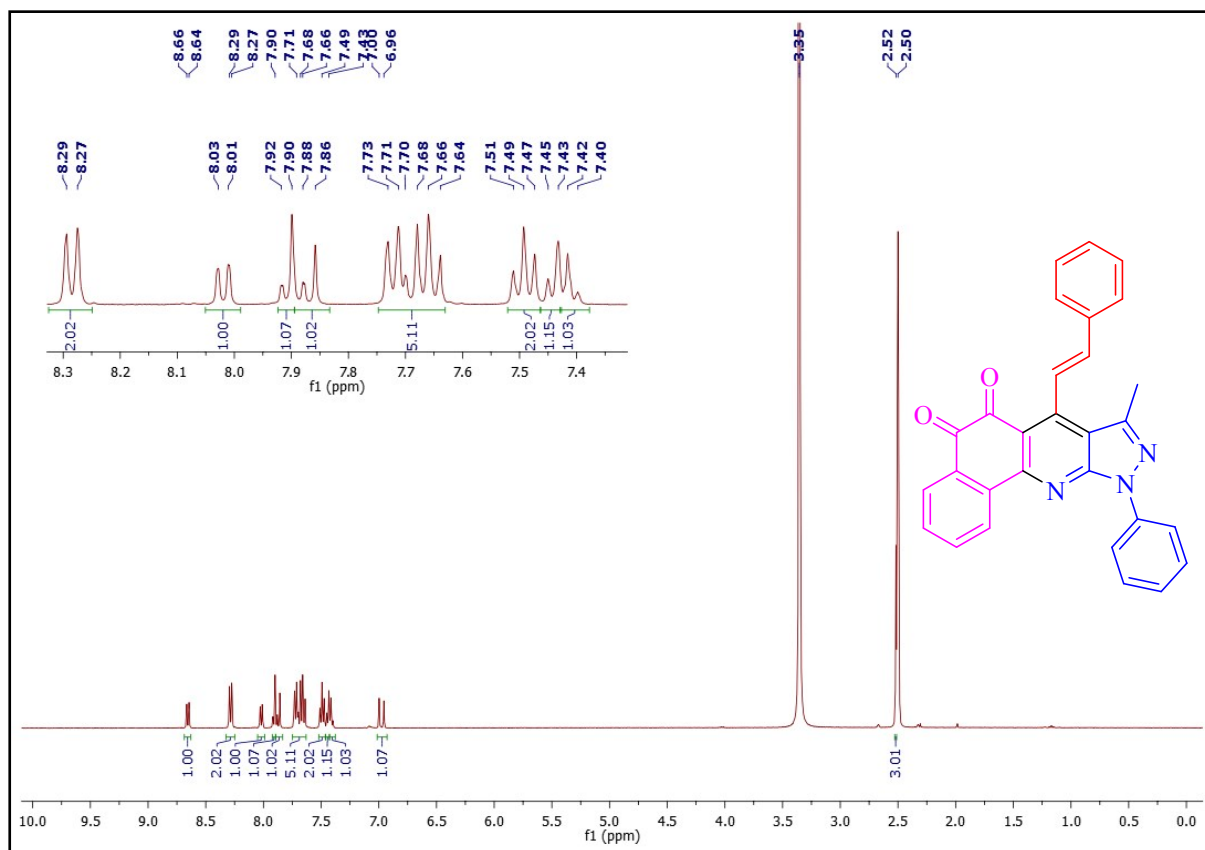

## <sup>1</sup>H NMR Spectra of Compound 4d

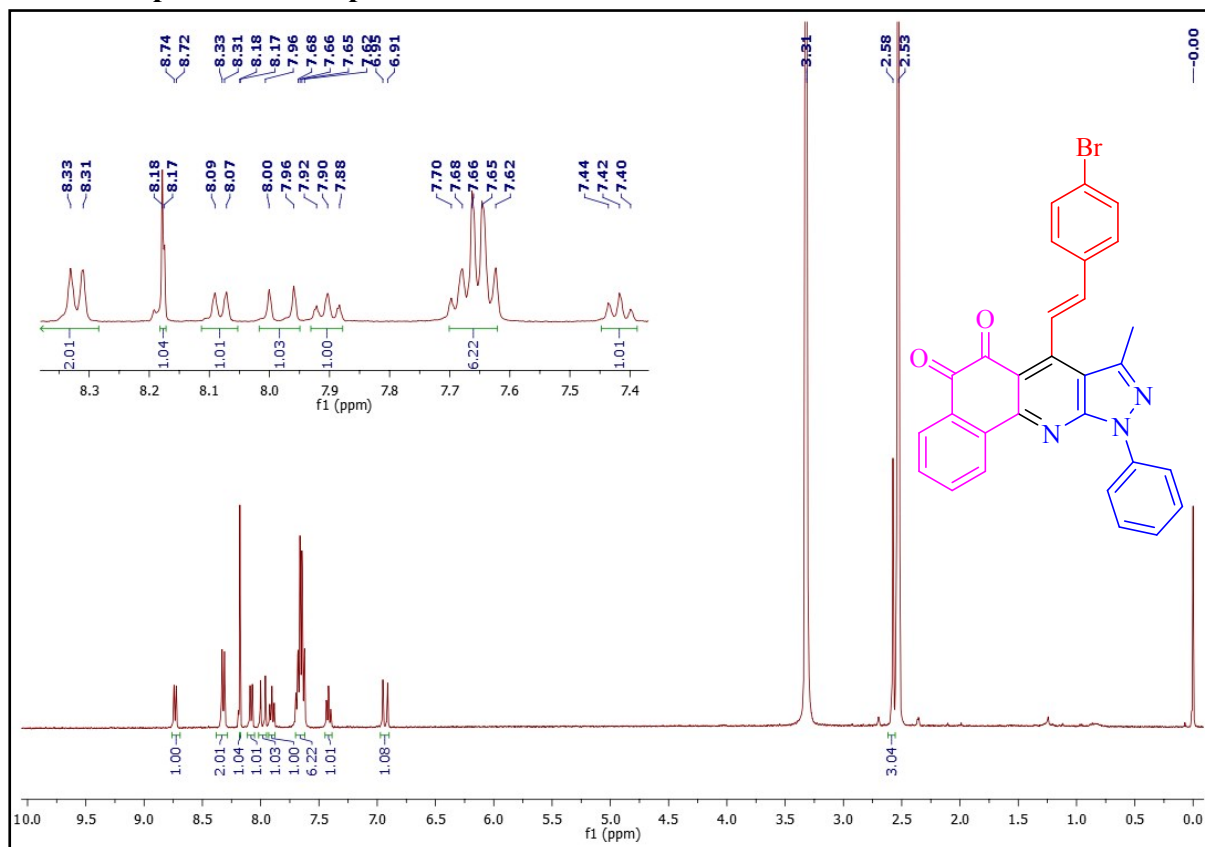

# Supporting Information

## <sup>1</sup>H NMR Spectra of Compound 4e

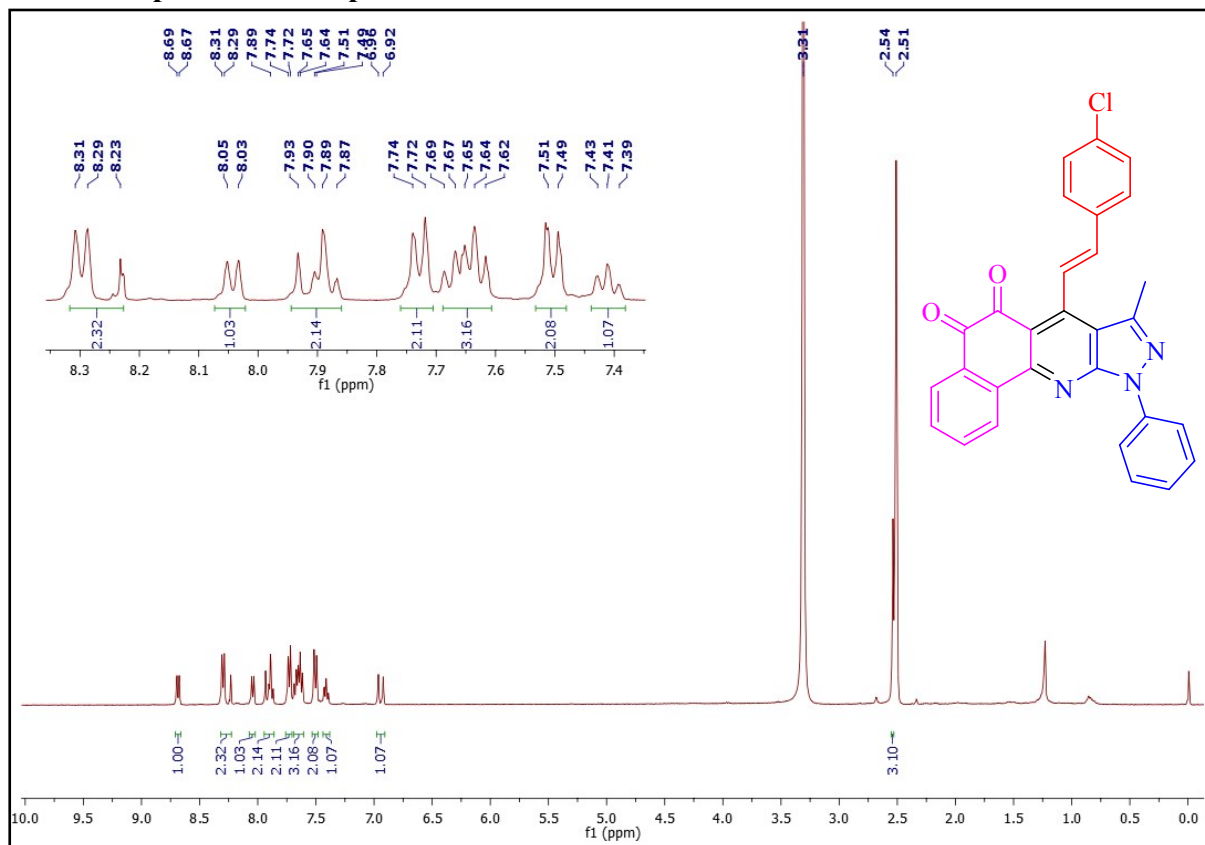

## <sup>1</sup>H NMR Spectra of Compound 4f

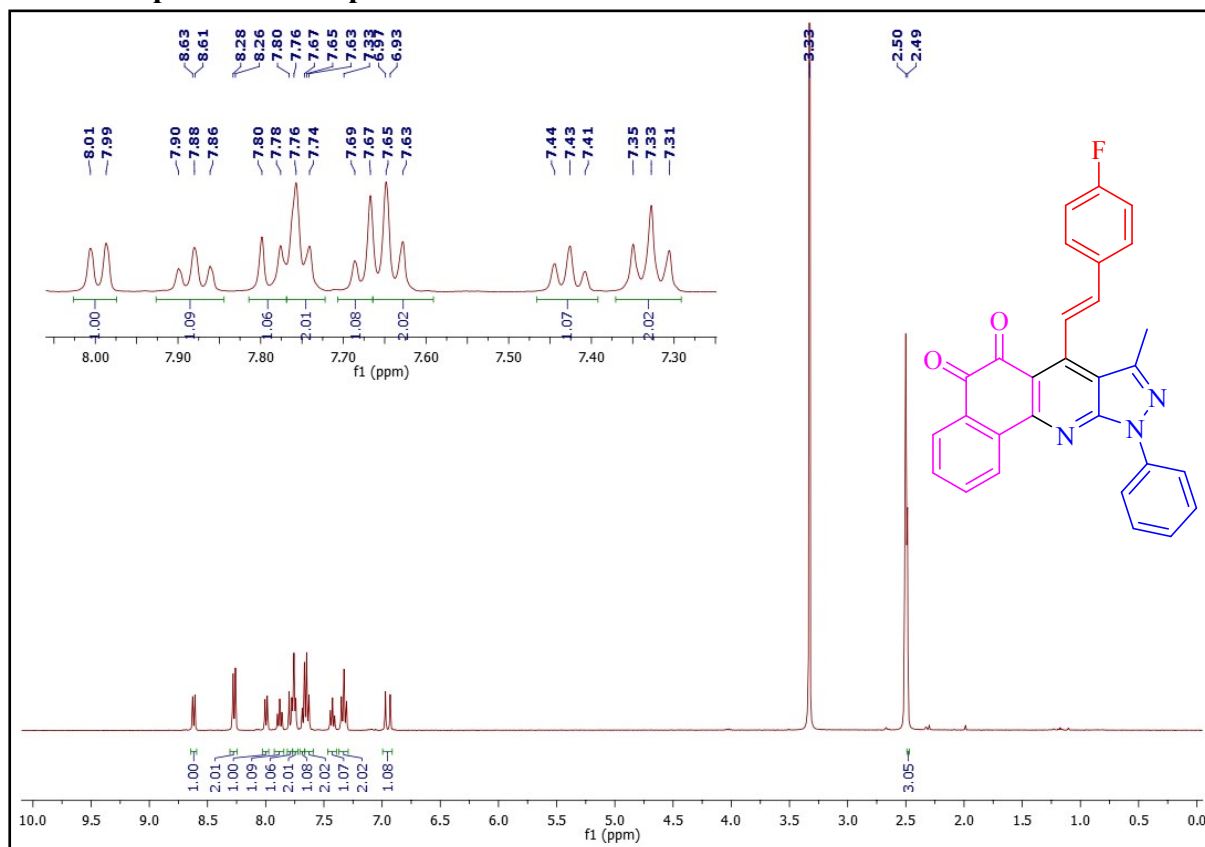

# Supporting Information

## <sup>1</sup>H NMR Spectra of Compound 4g

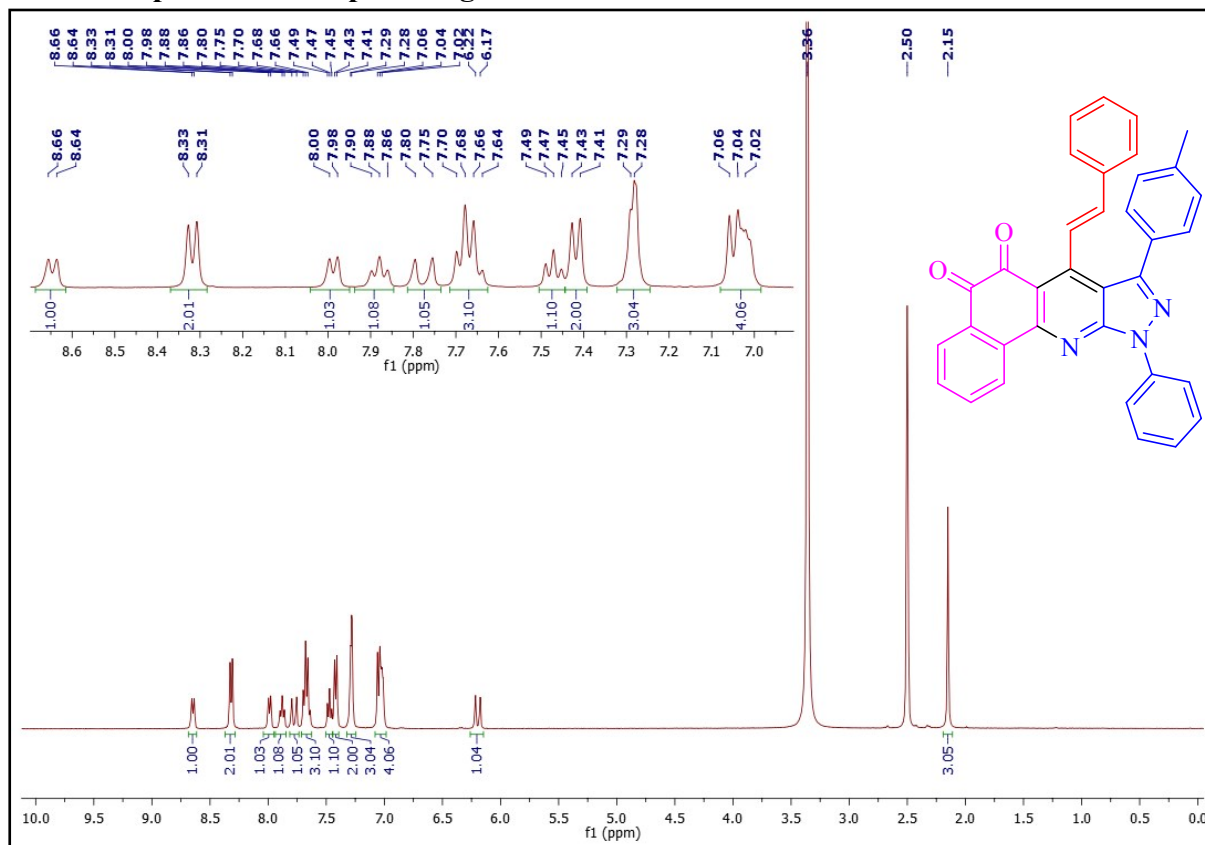

## <sup>1</sup>H NMR Spectra of Compound 4h

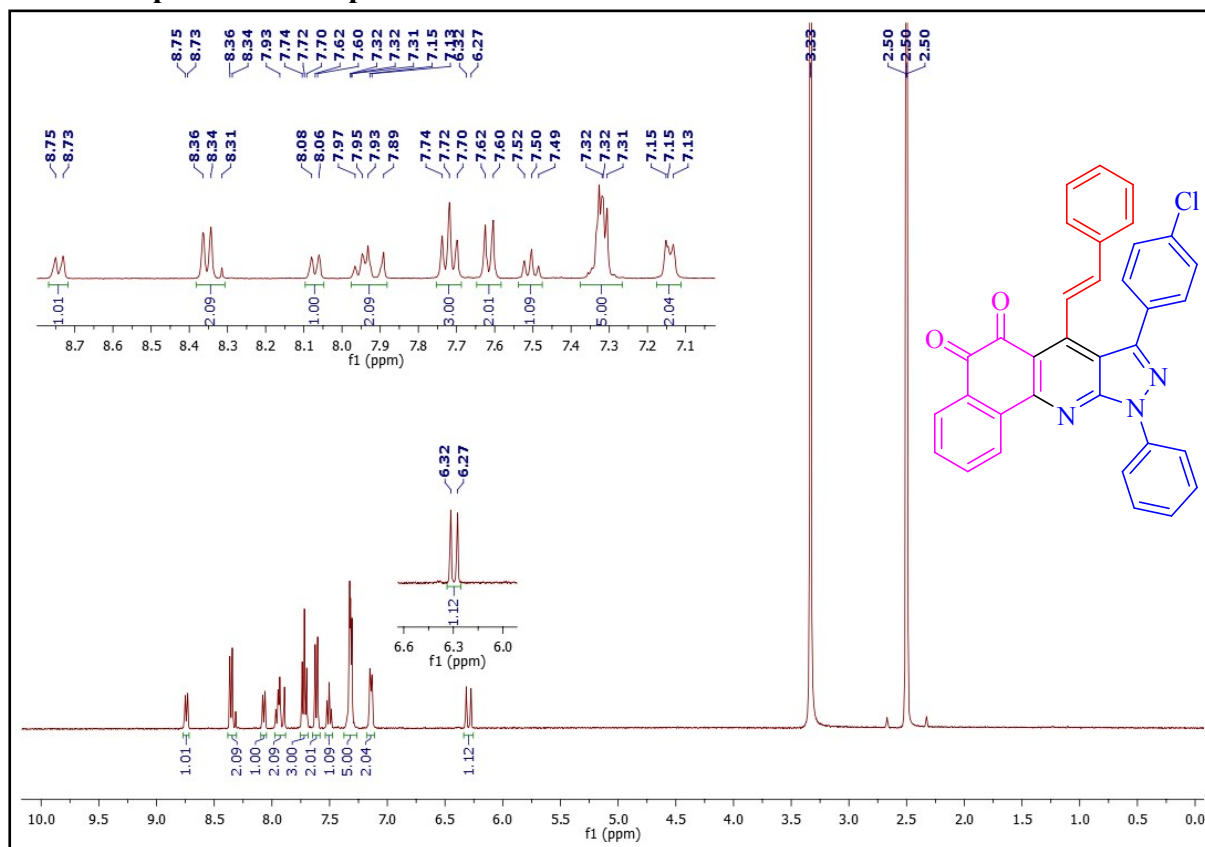



# Supporting Information

## <sup>1</sup>H NMR Spectra of Compound 4k

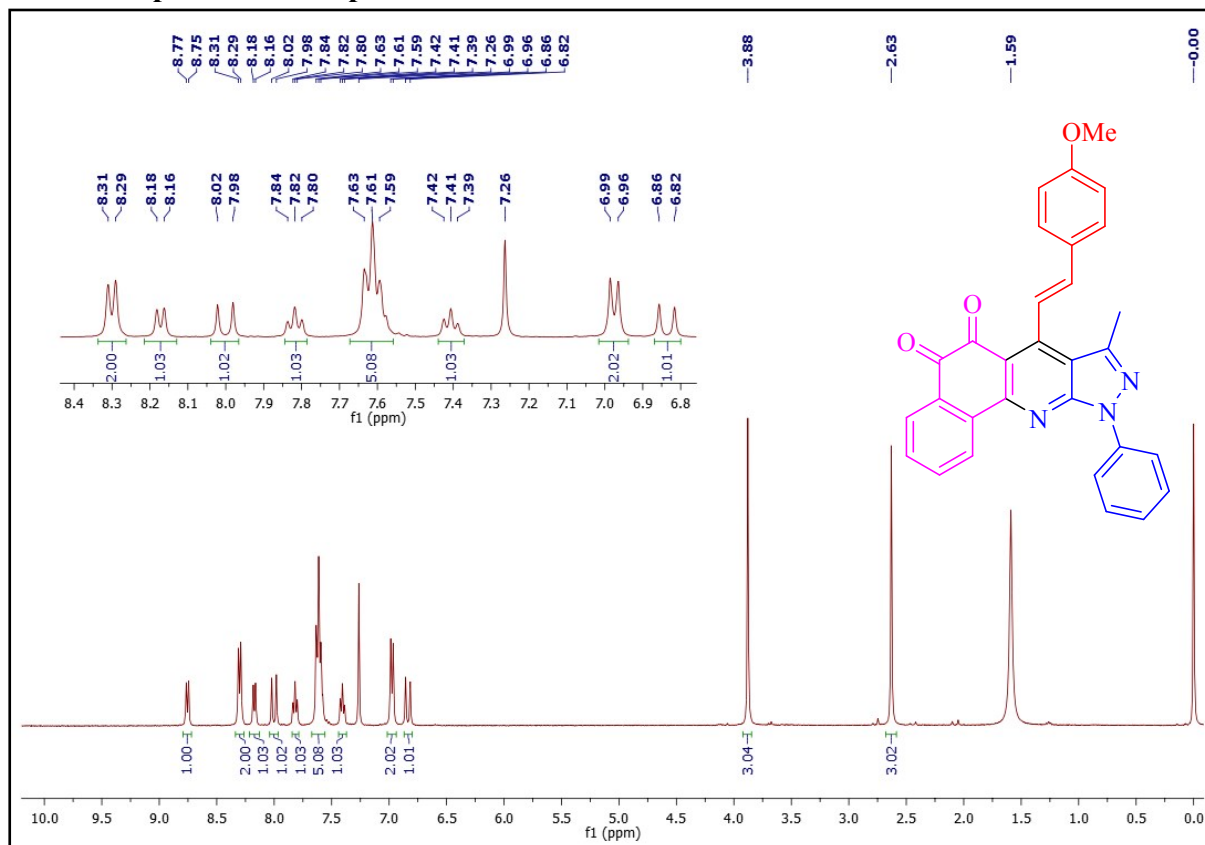

## <sup>1</sup>H NMR Spectra of Compound 4l

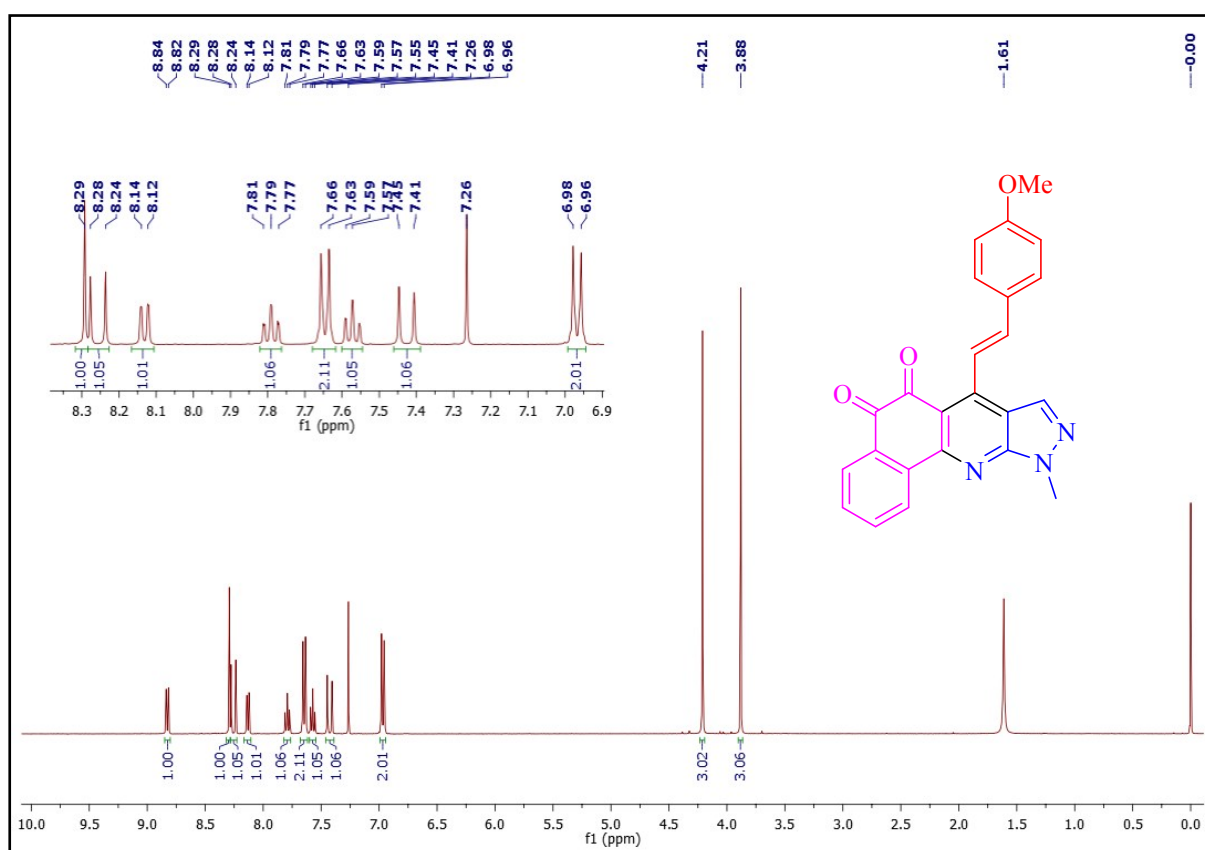

# Supporting Information

## <sup>1</sup>H NMR Spectra of Compound 4m

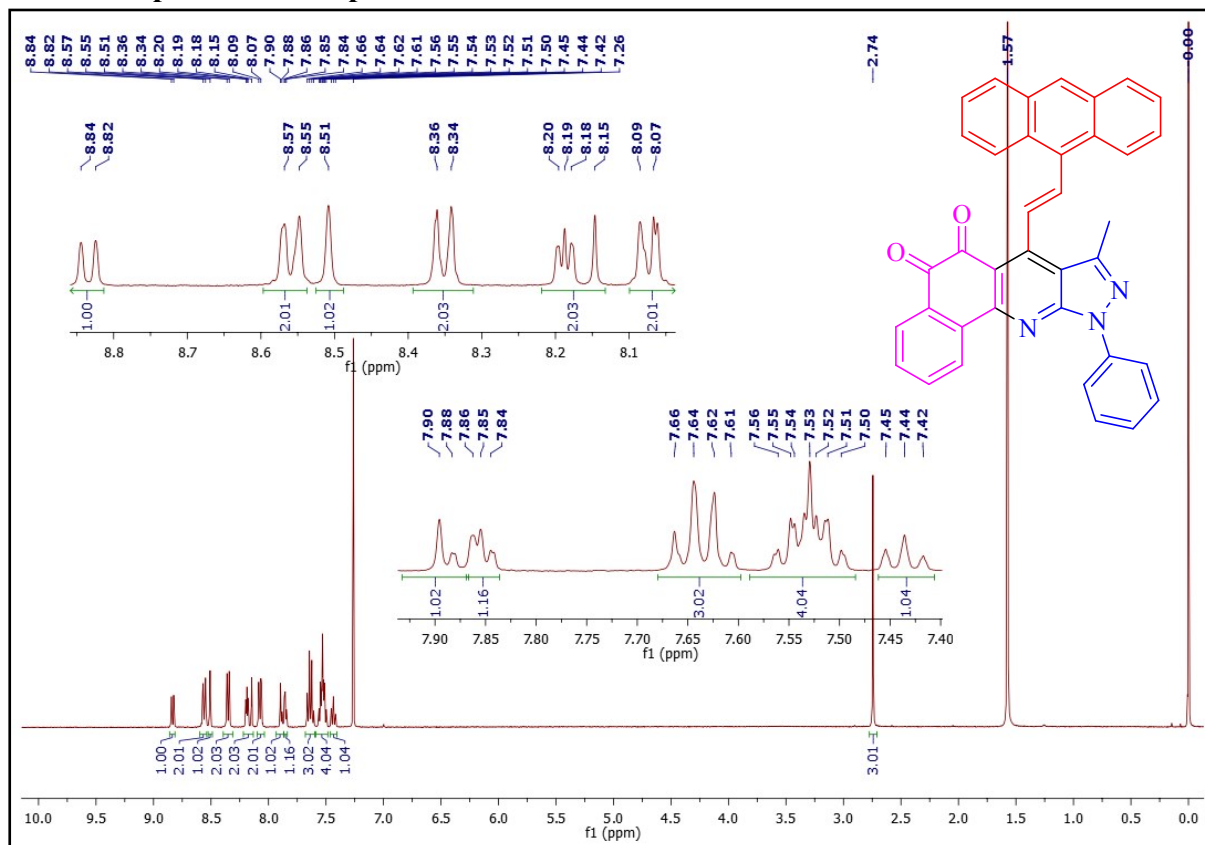

## <sup>1</sup>H NMR Spectra of Compound 4n

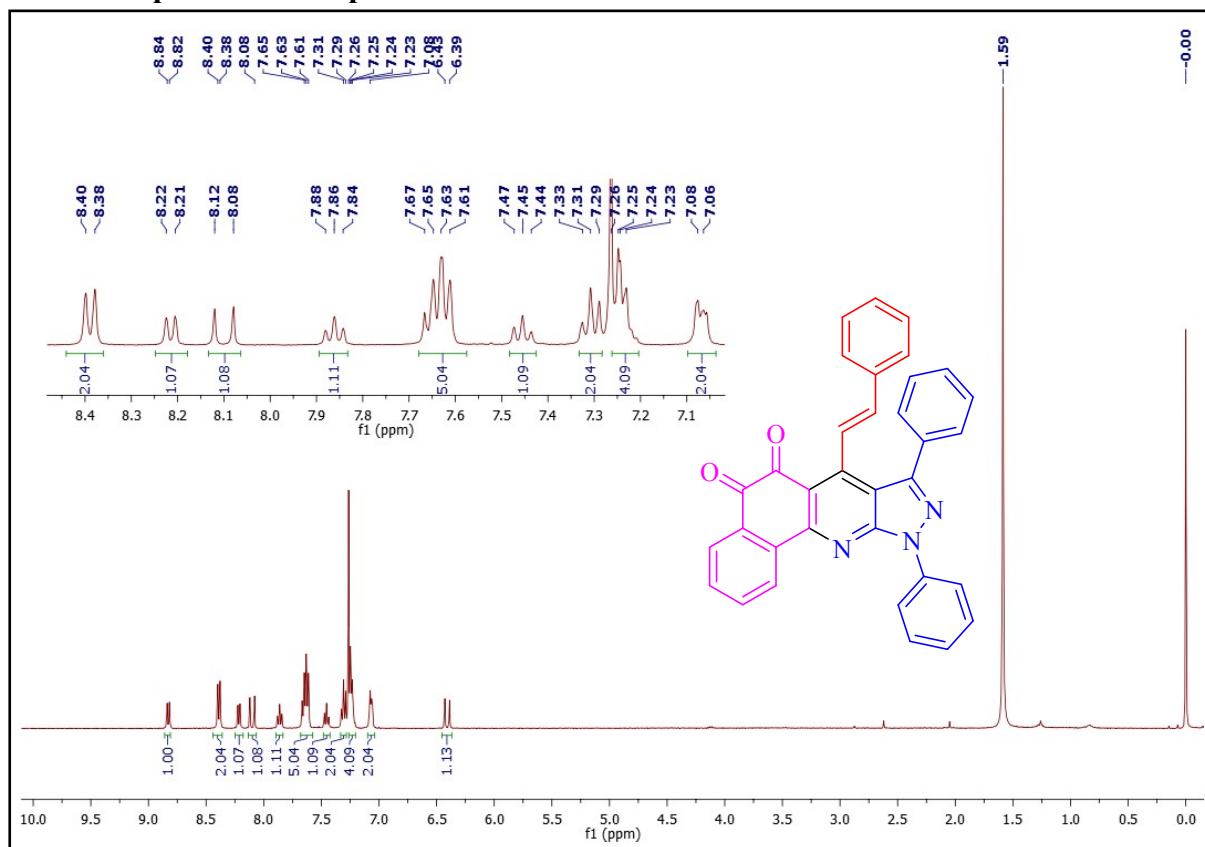



# Supporting Information

## <sup>1</sup>H NMR Spectra of Compound 4o

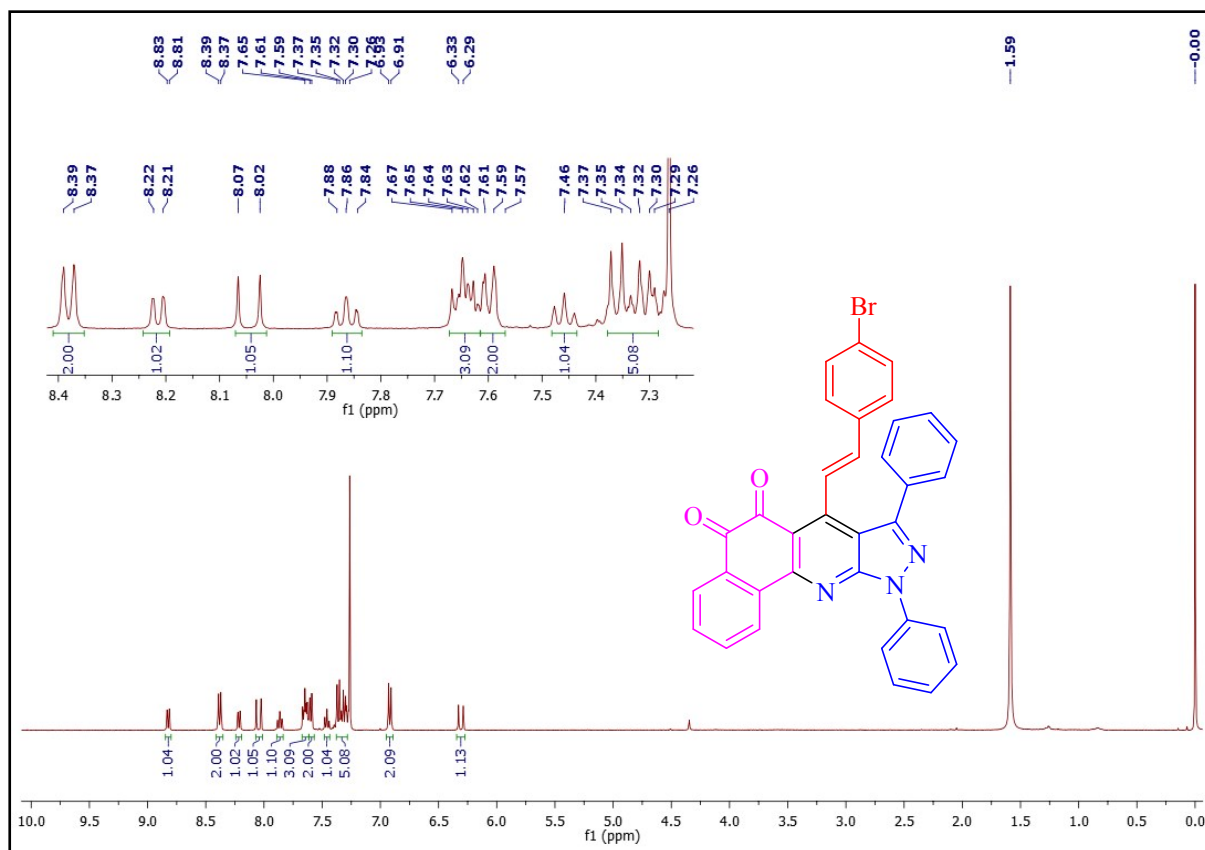

## Supporting Information

(A) XRD data of 4d with 50% ellipsoidal probability; crystallization:  $\text{CHCl}_3$  by slow evaporation at room-temperature. (CCDC 1982031).

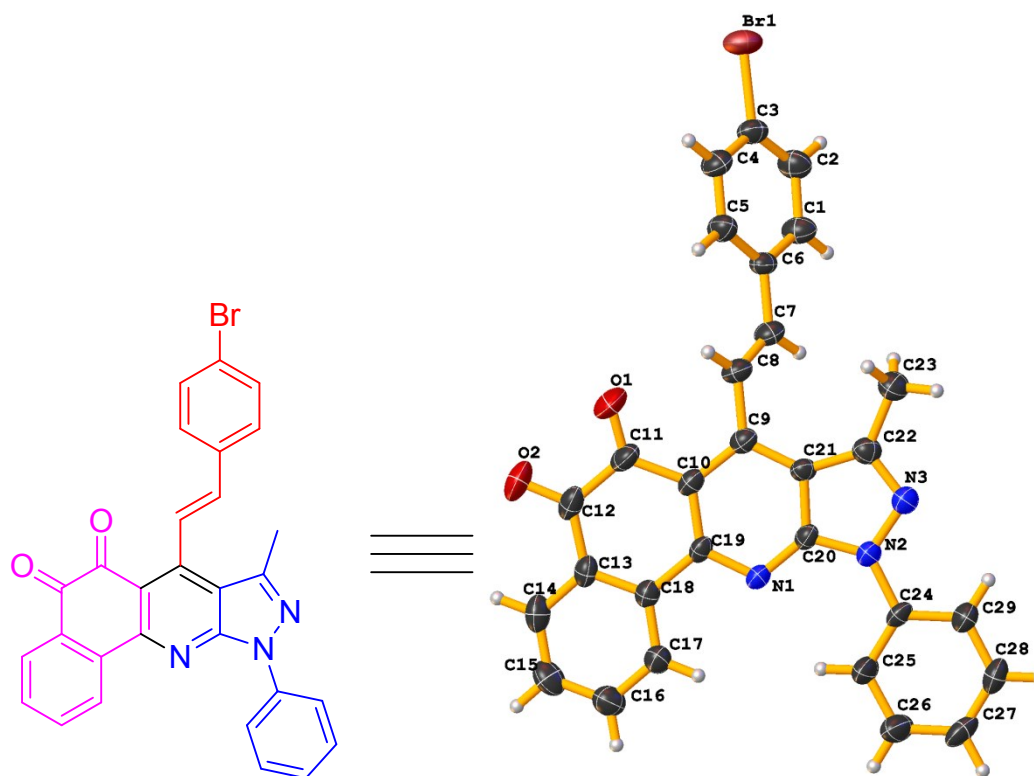

|                      |                                                    |                             |
|----------------------|----------------------------------------------------|-----------------------------|
| Identification code  | Ra184                                              |                             |
| Chemical formula     | $\text{C}_{29}\text{H}_{18}\text{BrN}_3\text{O}_2$ |                             |
| Formula weight       | 520.37 g/mol                                       |                             |
| Temperature          | 298(2) K                                           |                             |
| Wavelength           | 0.71073 Å                                          |                             |
| Crystal size         | 0.300 x 0.300 x 0.300 mm                           |                             |
| Crystal system       | triclinic                                          |                             |
| Space group          | P -1                                               |                             |
| Unit cell dimensions | $a = 10.6575(7)$ Å                                 | $\alpha = 110.376(2)^\circ$ |
|                      | $b = 10.8837(7)$ Å                                 | $\beta = 102.926(2)^\circ$  |
|                      | $c = 11.6850(8)$ Å                                 | $\gamma = 108.235(2)^\circ$ |
| Volume               | 1119.38(13) Å <sup>3</sup>                         |                             |

## Supporting Information

---

|                                     |                                                                                                                                                                       |
|-------------------------------------|-----------------------------------------------------------------------------------------------------------------------------------------------------------------------|
| Z                                   | 2                                                                                                                                                                     |
| Density (calculated)                | 1.544 g/cm <sup>3</sup>                                                                                                                                               |
| Absorption coefficient              | 1.870 mm <sup>-1</sup>                                                                                                                                                |
| F(000)                              | 528                                                                                                                                                                   |
| Theta range for data collection     | 2.96 to 26.00°                                                                                                                                                        |
| Index ranges                        | -13 ≤ h ≤ 13, -12 ≤ k ≤ 13, -14 ≤ l ≤ 14                                                                                                                              |
| Reflections collected               | 14398                                                                                                                                                                 |
| Independent reflections             | 4391 [R(int) = 0.0774]                                                                                                                                                |
| Coverage of independent reflections | 99.8%                                                                                                                                                                 |
| Absorption correction               | Multi-Scan                                                                                                                                                            |
| Max. and min. transmission          | 0.5710 and 0.5650                                                                                                                                                     |
| Structure solution technique        | direct methods                                                                                                                                                        |
| Structure solution program          | SHELXS-97 (Sheldrick 2008)                                                                                                                                            |
| Refinement method                   | Full-matrix least-squares on F <sup>2</sup>                                                                                                                           |
| Refinement program                  | SHELXL-2014 (Sheldrick 2014)                                                                                                                                          |
| Function minimized                  | $\Sigma w(F_o^2 - F_c^2)^2$                                                                                                                                           |
| Data / restraints / parameters      | 4391 / 0 / 318                                                                                                                                                        |
| Goodness-of-fit on F <sup>2</sup>   | 1.010                                                                                                                                                                 |
| Final R indices                     | 2306 data; I > 2σ(I)    R1 = 0.0570, wR2 = 0.0735<br>all data                    R1 = 0.1500, wR2 = 0.0932                                                            |
| Weighting scheme                    | w = 1/[σ <sup>2</sup> (F <sub>o</sub> <sup>2</sup> ) + (0.0211P) <sup>2</sup> + 0.6426P]<br>where P = (F <sub>o</sub> <sup>2</sup> + 2F <sub>c</sub> <sup>2</sup> )/3 |
| Extinction coefficient              | 0.0024(5)                                                                                                                                                             |
| Largest diff. peak and hole         | 0.270 and -0.390 eÅ <sup>-3</sup>                                                                                                                                     |
| R.M.S. deviation from mean          | 0.066 eÅ <sup>-3</sup>                                                                                                                                                |

---

## Supporting Information

(B) XRD data of 4f with 50% ellipsoidal probability; crystallization:  $\text{CHCl}_3$  by slow evaporation at room-temperature. (CCDC 1982028).

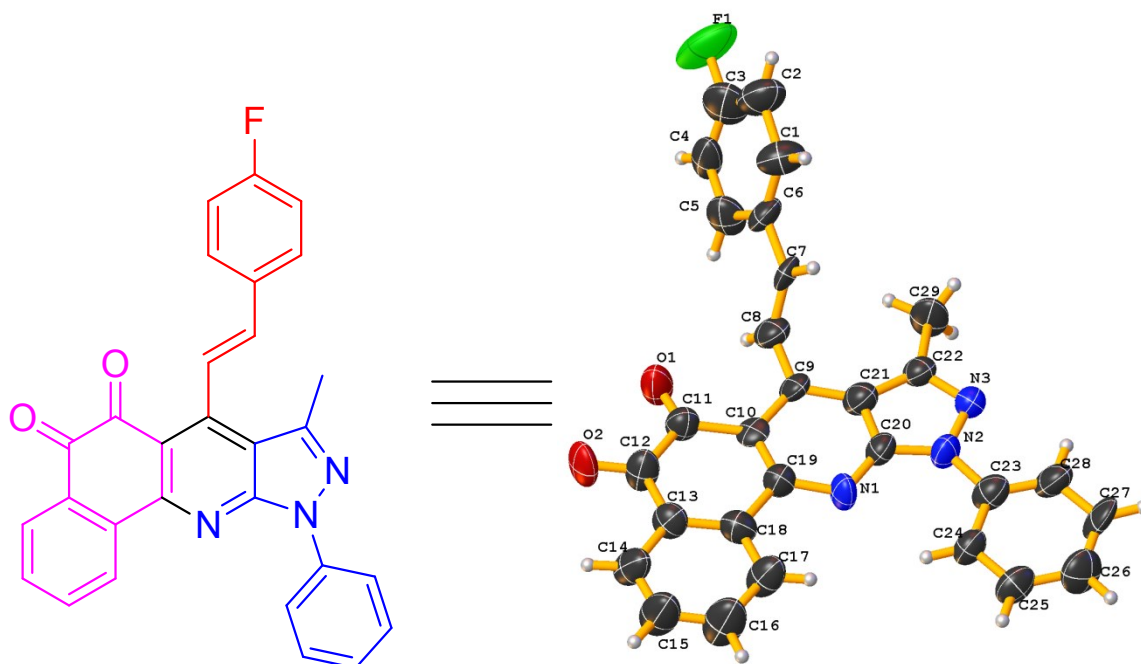

|                      |                                                   |                           |
|----------------------|---------------------------------------------------|---------------------------|
| Identification code  | Ra-151r                                           |                           |
| Chemical formula     | $\text{C}_{29}\text{H}_{18}\text{FN}_3\text{O}_2$ |                           |
| Formula weight       | 459.46 g/mol                                      |                           |
| Temperature          | 298(2) K                                          |                           |
| Wavelength           | 0.71073 Å                                         |                           |
| Crystal size         | 0.100 x 0.200 x 0.200 mm                          |                           |
| Crystal system       | Monoclinic                                        |                           |
| Space group          | Pc                                                |                           |
| Unit cell dimensions | $a = 9.177(4)$ Å                                  | $\alpha = 90^\circ$       |
|                      | $b = 12.753(5)$ Å                                 | $\beta = 123.03(2)^\circ$ |
|                      | $c = 11.653(4)$ Å                                 | $\gamma = 90^\circ$       |
| Volume               | 1143.4(8) Å <sup>3</sup>                          |                           |
| Z                    | 2                                                 |                           |

## Supporting Information

---

|                                     |                                                                                                                                                            |                           |
|-------------------------------------|------------------------------------------------------------------------------------------------------------------------------------------------------------|---------------------------|
| Density (calculated)                | 1.335 Mg/m <sup>3</sup>                                                                                                                                    |                           |
| Absorption coefficient              | 0.091 mm <sup>-1</sup>                                                                                                                                     |                           |
| F(000)                              | 476                                                                                                                                                        |                           |
| Theta range for data collection     | 2.65 to 20.00°                                                                                                                                             |                           |
| Index ranges                        | -8 ≤ h ≤ 8, -12 ≤ k ≤ 12, -11 ≤ l ≤ 11                                                                                                                     |                           |
| Reflections collected               | 10931                                                                                                                                                      |                           |
| Independent reflections             | 2133 [R(int) = 0.2956]                                                                                                                                     |                           |
| Coverage of independent reflections | 99.8 %                                                                                                                                                     |                           |
| Absorption correction               | Multi-Scan                                                                                                                                                 |                           |
| Max. and min. transmission          | 0.7465 and 0.6325                                                                                                                                          |                           |
| Structure solution technique        | direct methods                                                                                                                                             |                           |
| Structure solution program          | SHELXS-97 (Sheldrick 2008)                                                                                                                                 |                           |
| Refinement method                   | Full-matrix least-squares on F <sup>2</sup>                                                                                                                |                           |
| Refinement program                  | SHELXL-2018/3 (Sheldrick, 2018)                                                                                                                            |                           |
| Function minimized                  | Σ w(F <sub>o</sub> <sup>2</sup> - F <sub>c</sub> <sup>2</sup> ) <sup>2</sup>                                                                               |                           |
| Data / restraints / parameters      | 2133 / 196 / 316                                                                                                                                           |                           |
| Goodness-of-fit on F <sup>2</sup>   | 1.026                                                                                                                                                      |                           |
| Final R indices                     | 833 data; I > 2σ(I)                                                                                                                                        | R1 = 0.0817, wR2 = 0.1479 |
|                                     | all data                                                                                                                                                   | R1 = 0.2444, wR2 = 0.2121 |
| Weighting scheme                    | w = 1/[σ <sup>2</sup> (F <sub>o</sub> <sup>2</sup> ) + (0.0785P) <sup>2</sup> ], where P = (F <sub>o</sub> <sup>2</sup> + 2F <sub>c</sub> <sup>2</sup> )/3 |                           |
| Largest diff. peak and hole         | 0.189 and -0.245 e.Å <sup>-3</sup>                                                                                                                         |                           |
| R.M.S. deviation from mean          | 0.054 eÅ <sup>-3</sup>                                                                                                                                     |                           |

---
